# Supplementary material
Source: Springer Nature journal article supplement (https://www.springermedizin.de/resource/supplementary/12958_2012_1033_MOESM1_ESM.pdf/9566628)

CFTR

NF- $\kappa$ B

MUC1

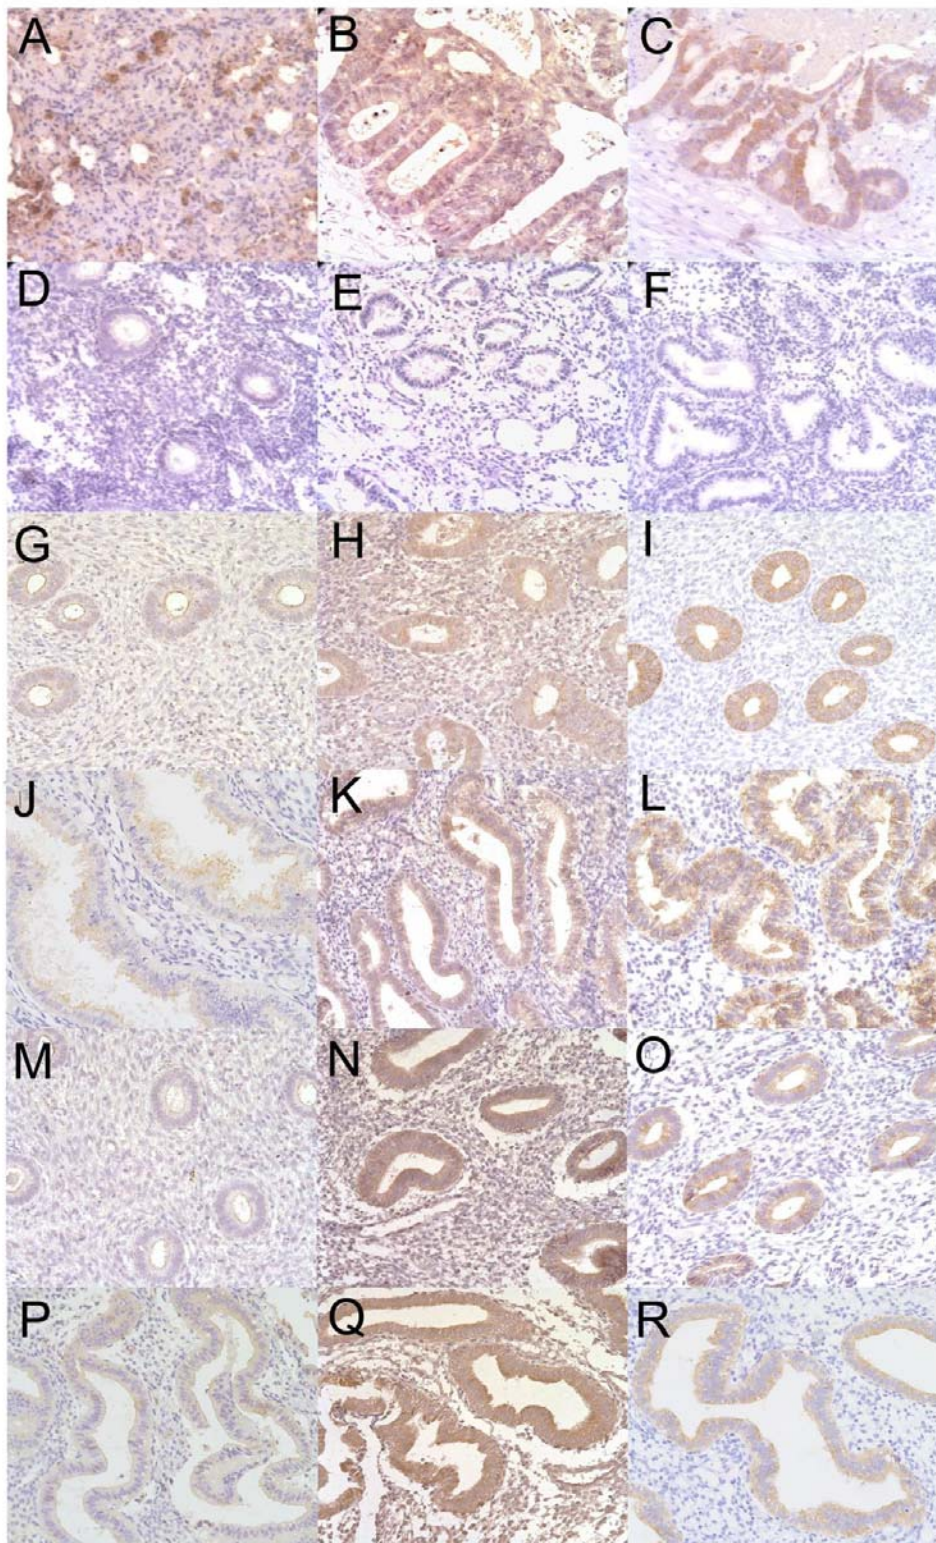

Supplement: MOESM1 [file 9566628]
